# Supplementary material for: PAX5 and circ1857 affected DLBCL progression and B‐cell proliferation through regulating GINS1
Source: PubMed Central journal article supplement — Cancer Sci. 2023 May 23;114(8):3203–15. doi: 10.1111/cas.15856 (PMC10394140; doi:10.1111/cas.15856), 2023-05-23

## Supplementary Material

**Supplementary Table S1. Clinicopathological characteristics of 30 DLBCL patients.**

| Characteristic         | n  | GINS1                                 |                                      | P value       |
|------------------------|----|---------------------------------------|--------------------------------------|---------------|
|                        |    | High expression*<br>(number of cases) | Low expression*<br>(number of cases) |               |
| Gender                 |    |                                       |                                      |               |
| Male                   | 20 | 18                                    | 2                                    | 0.3           |
| Female                 | 10 | 7                                     | 3                                    |               |
| Age (median age: 56)   |    |                                       |                                      |               |
| <60                    | 19 | 16                                    | 3                                    | 0.999         |
| ≥ 60                   | 11 | 9                                     | 2                                    |               |
| Subgroups              |    |                                       |                                      |               |
| GCB                    | 14 | 10                                    | 4                                    | 0.1571        |
| ABC                    | 16 | 15                                    | 1                                    |               |
| PS*                    |    |                                       |                                      |               |
| 0-1                    | 12 | 10                                    | 2                                    | 0.999         |
| 2-4                    | 18 | 15                                    | 3                                    |               |
| Stage                  |    |                                       |                                      |               |
| I-II                   | 9  | 5                                     | 4                                    | <b>0.0195</b> |
| III-IV                 | 21 | 20                                    | 1                                    |               |
| LDH*                   |    |                                       |                                      |               |
| Normal                 | 16 | 12                                    | 4                                    | 0.3359        |
| High                   | 14 | 13                                    | 1                                    |               |
| IPI scores*            |    |                                       |                                      |               |
| 0-2                    | 18 | 15                                    | 3                                    | 0.999         |
| 3-5                    | 12 | 10                                    | 2                                    |               |
| PAX5*                  |    |                                       |                                      |               |
| Positive               | 26 | 24                                    | 2                                    | <b>0.0093</b> |
| Negative               | 4  | 1                                     | 3                                    |               |
| Extranodal involvement |    |                                       |                                      |               |
| <2                     | 17 | 13                                    | 4                                    | 0.3549        |
| ≥2                     | 13 | 12                                    | 1                                    |               |

Note:

\*PS: Performance status

\*LDH: Lactate dehydrogenase

\*IPI scores: international prognostic index

\*PAX5: The expression of PAX5 was performed by Immunohistochemical staining. PAX5 positive DLBCL was defined as 30% or more of the lymphoma cells showing distinct PAX5 nuclear staining. Among PAX-negative DLBCL cases, PAX5 staining cells was less 30% of the lymphoma cells.

\*GINS1: Western blotting was used to measure the GINS1 protein levels. ImageJ was used to compare the density of bands on western blot. Compared with the GINS1 average value of control people, when relative density values were above 3.5, then it was defined as high expression. While relative density values were below 3.5, then it was defined as low expression.

**Supplementary Table S2. Primers sequences and shRNA target sequences**

| Name                          | Sequences                               |
|-------------------------------|-----------------------------------------|
| H/m PAX5-Forward              | GCATAGTGTCTACAGGCTCCG                   |
| H/m PAX5-Reverse              | GATGGGTTCCTGGTGGT                       |
| Human GINS1-Forward           | CTTCAACGAGGATGGACT                      |
| Human GINS1-Reverse           | CATTTGGCAAGACGCTAC                      |
| Mouse GINS1-Forward           | CTCAGGTGGGAATATGGGAGT                   |
| Mouse GINS1-Reverse           | CACCGAGGCAAAAAGTGCTG                    |
| Human $\beta$ -actin-Forward  | CCATCGTCCACCGCAAAT                      |
| Human $\beta$ -actin -Reverse | CCTGTAACAACGCATCTCATA                   |
| Mouse GAPDH-Forward           | TGTGTCCGTCGTGGATCTGA                    |
| Mouse GAPDH-Reverse           | TTGCTGTTGAAGTCGCAGGAG                   |
| Divergent circ1857-Forward    | TCCTCGGTGAGCACGGATTC                    |
| Divergent circ1857-Reverse    | ACAACCATGGCTGACCCGAA                    |
| Convergent circ1857-Forward   | CTTGGCAGGTATTATGAGACA                   |
| Convergent circ1857-Reverse   | ACTGGTTGGTTGGGTGGC                      |
| Human PRDM1-Forward           | GGGATTCTGGTGCTGATGGC                    |
| Human PRDM1-Reverse           | GGTTGGCAGGGATGGGCTTA                    |
| Mouse PRDM1-Forward           | GAACCTGCTTTTCAAGTATGCTG                 |
| Mouse PRDM1-Reverse           | AGTGTAGACTTCACCGATGAGG                  |
| Human U6-Forward              | GCTTCGGCAGCACATACTAAAAT                 |
| Human U6-Reverse              | CGCTTACGAATTTGCGTGTCAT                  |
| shcontrol                     | CCTAAGGTTAAGTCGCCCTCG                   |
| shPAX5-1                      | GACTATCCATCCATCATAA                     |
| shPAX5-2                      | CGGCCACTCGCTTCCGGGC                     |
| shGINS1-1                     | TCAGGTGGACGAAGTGATT                     |
| shGINS1-2                     | CCTGTATGACCGCTTGCTT                     |
| shcirc1857-1                  | AGAGAGACGAAGGACATGGAG                   |
| shcirc1857-2                  | GAGACGAAGGACATGGAGGAG                   |
| P-1500/+50-LUC sense          | CCTGAGCTCGCTAGCCTCGAGAAAAAGGCAATGTTTGCT |
| P-1500/+50-LUC antisense      | CAGTACCGGATTGCCAAGCTTACAGCGCCAGGCTCTCGC |
| P-550/+50-LUC sense           | CCTGAGCTCGCTAGCCTCGAGGAAAGCCTAAATAACAGT |
| P-550/+50-LUC antisense       | CAGTACCGGATTGCCAAGCTTACAGCGCCAGGCTCTCGC |
| P-400/+50-LUC sense           | CCTGAGCTCGCTAGCCTCGAGTACCCAATAAAAGAGAGT |
| P-400/+50-LUC antisense       | CAGTACCGGATTGCCAAGCTTACAGCGCCAGGCTCTCGC |
| P-1500mut1/+50-LUC sense      | GGTGAAAAAAAATGTAATTCAGCACTTTGG          |
| P-1500mut1/+50-LUC antisense  | TACATTTTTTTTACCAGCACCAGCAAACAT          |
| P-550mut2/+50-LUC sense       | AGCTAAAAAAAATTGGGCAAGTTACCTAACT         |
| P-550mut2/+50-LUC antisense   | CCAATTTTTTTTAGCTCTCCAGAGTGATTAG         |
| pmirGLO GINS1-F               | CCTCGAGTTGGGAGAATTGACATCTTAA            |
| pmirGLO GINS1-R               | GTCTAGATTAGAAAGGAAGGAGTAAAAC            |
| pmirGLO GINS1Mut-F            | AACATAACCACCAACAATGGTATTTTAAAATT        |
| pmirGLO GINS1Mut-R            | AAATGCTGACATGGTTTTGTTGGTGGTATGTT        |

**Supplementary Table S3. Plasmids**

| Reagent or Resource                    | Source      | Identifier |
|----------------------------------------|-------------|------------|
| pCMV-N-Flag Control Vector             | Beyotime    | Cat#D2722  |
| pCDH-CMV-MCS-EF1-CopGFP-T2A-puro       | Addgene     | Cat#72263  |
| pLP1                                   | Miaolingbio | P0264      |
| pLP2                                   | Miaolingbio | P0265      |
| pLP/VSVG                               | Miaolingbio | P0266      |
| pLKO.1 puro                            | Addgene     | Cat#8453   |
| psPAX2                                 | Addgene     | Cat#12260  |
| pMD2.G                                 | Addgene     | Cat#12259  |
| pCMV-N-Flag-PAX5                       | This paper  | N/A        |
| pCMV-N-Flag-PAX5 P80R                  | This paper  | N/A        |
| pET-32a-Trx                            | Miaolingbio | P0033      |
| pET-32a-Trx-PAX5                       | This paper  | N/A        |
| pET-32a-Trx-PAX5 P80R                  | This paper  | N/A        |
| pLKO.1-shcontrol                       | This paper  | N/A        |
| pLKO.1-shGINS1 -1                      | This paper  | N/A        |
| pLKO.1-shGINS1 -2                      | This paper  | N/A        |
| pLKO.1-shPAX5 -1                       | This paper  | N/A        |
| pLKO.1-shPAX5 -2                       | This paper  | N/A        |
| pLKO.1-shcirc1857 -1                   | This paper  | N/A        |
| pLKO.1- shcirc1857 -2                  | This paper  | N/A        |
| pCDH-CMV-MCS-EF1-GINS1-CopGFP-T2A-puro | This paper  | N/A        |
| pCDH-CMV-MCS-EF1-PAX5-CopGFP-T2A-puro  | This paper  | N/A        |
| pLCDH-ciR-circ1857                     | This paper  | N/A        |
| pLCDH-ciR                              | Geneseed    | GS0103     |
| pGL-4.17 Basic                         | Promega     | #9PIE672   |
| P-1500/+50-LUC                         | This paper  | N/A        |
| P-1500mut1/+50-LUC                     | This paper  | N/A        |
| P-550/+50-LUC                          | This paper  | N/A        |
| P-550mut2/+50-LUC                      | This paper  | N/A        |
| P-400/+50-LUC                          | This paper  | N/A        |
| pmirGLO GINS1                          | This paper  | N/A        |
| pmirGLO GINS1 Mut                      | This paper  | N/A        |

**Supplementary Table S4. Probes and primers sequences**

| name          | Sequences                  |
|---------------|----------------------------|
| Probe-1       | GGTGCGGTGGCTCACGCTGTAATTCC |
| Probe-2       | TCTGGAGCTGTGTGACCTTGGGCAAG |
| Probe-1-mut   | GCTGGGTGCGGTGTGTAATTCCAGCA |
| Probe-2-mut   | TCACTCTGGAGCTTTGGGCAAGTTAC |
| ChIP-GINS1-1F | GGAAATGGAAAGCCTAAAT        |
| ChIP-GINS1-1R | CAGAGCTGGAAATAAATGC        |
| ChIP-GINS1-2F | CAAAGGGTGGTACTGTGGTG       |
| ChIP-GINS1-2R | CATTGGTAGGACGCAAGGGT       |
| ChIP-GAPDH-F  | GGCTGGATGGAATGAAAGG        |
| ChIP-GAPDH-R  | GCACGGAAGGTCACGATGT        |

**Supplementary Table S5. Stable cell lines**

| Cell lines name             | Source     |
|-----------------------------|------------|
| Farage-Control              | This paper |
| Farage-OE-GINS1             | This paper |
| Farage-OE-PAX5              | This paper |
| Farage-OE-circ1857          | This paper |
| SU-DHL-2- shcontrol         | This paper |
| SU-DHL-2- shGINS1-1         | This paper |
| SU-DHL-2- shGINS1-2         | This paper |
| SU-DHL-2- shPAX5-1          | This paper |
| SU-DHL-2- shPAX5-2          | This paper |
| SU-DHL-2- shcirc1857-1      | This paper |
| SU-DHL-2- shcirc1857-2      | This paper |
| SU-DHL-2- shPAX5-1+OE-GINS1 | This paper |
| SU-DHL-2- shPAX5-2+OE-GINS1 | This paper |
| IM-9-Control                | This paper |
| IM-9-OE-PAX5                | This paper |
| IM-9-OE-circ1857            | This paper |
| DB- shcontrol               | This paper |
| DB- shPAX5-1                | This paper |
| DB- shPAX5-2                | This paper |
| DB- shPAX5-1+OE-GINS1       | This paper |
| DB- shPAX5-2+OE-GINS1       | This paper |

**Supplementary Table S6. Chemicals and antibodies**

| REAGENT or RESOURCE                              | SOURCE                                   | IDENTIFIER           |
|--------------------------------------------------|------------------------------------------|----------------------|
| <b>Chemicals</b>                                 |                                          |                      |
| Fetal Bovine Serum                               | Gibco                                    | Cat# 10099-141       |
| GenEscortII                                      | Nanjing Wisegen<br>Biotechnology Company | Cat# WIS 2100        |
| ClonExpress II One Step Cloning Kit              | Vazyme                                   | Cat# C112-01         |
| Mut Express™ II Fast Mutagenesis<br>Kit          | Vazyme                                   | Cat# C214-01         |
| TRIZol                                           | Beyotime                                 | Cat# R0016           |
| BeyoRT™ II cDNA first chain<br>synthesis kit     | Beyotime                                 | Cat# D7168L          |
| IPTG                                             | ThermoFisher                             | Cat# 34060           |
| Firefly Luciferase Reporter Gene<br>Assay Kit    | Beyotime                                 | Cat# RG005           |
| β-galactosidase Assay Kit                        | Beyotime                                 | Cat# RG0036          |
| Chromatin Immunoprecipitation<br>(ChIP)Assay Kit | Beyotime                                 | Cat# P2078           |
| Chemiluminescent EMSA Kit                        | Beyotime                                 | Cat# GS009           |
| Lipopolysaccharides                              | Beyotime                                 | Cat# ST1470          |
| Super ECL Detection Reagent ECL                  | YEASEN                                   | Cat#<br>36208ES60    |
| Cell Counting Kit-8                              | Apexbio                                  | Cat# K1018           |
| SYBR® Premix Ex Taq™ II                          | Takara                                   | Cat# DRR820A         |
| RIPA Lysis buffer                                | Beyotime                                 | Cat# P0013B          |
| BSA                                              | Beyotime                                 | Cat# ST025           |
| Paraformaldehyde                                 | Sangon Biotech                           | Cat# A500684         |
| Ficoll 400                                       | MULTI Sciences                           | Cat# 70-<br>MLSM1092 |
| Actinomycin D                                    | Xiyashiji                                | A14832               |
| Recombinant human IL-21 Protein                  | R&D systems                              | 8879-IL              |
| BCA Protein Assay Kit                            | Thermo Fisher Scientific                 | Cat# 23227           |
| <b>Antibodies</b>                                |                                          |                      |
| Anti-PAX5                                        | Abcam                                    | ab109443             |
| Anti-GINS1                                       | Abcam                                    | ab181112             |
| Anti-PRDM1                                       | Thermos fisher scientific                | MA1-16874            |
| Anti-α-Tubulin                                   | Proteintech company                      | 66031-1-Ig           |
| Anti-Flag                                        | Proteintech company                      | 66008-4-Ig           |
| CD45R (B220) MicroBeads,mouse                    | Miltenyi Biotec                          | 130-049-501          |
| CD138 MicroBeads, mouse                          | Miltenyi Biotec                          | 130-098-257          |
| Streptavidin MicroBeads                          | Miltenyi Biotec                          | 130-048-101          |
| IgD Antibody, anti-mouse, Biotin                 | Miltenyi Biotec                          | 130-101-899          |
| Anti-Mouse IgM MicroBeads                        | Miltenyi Biotec                          | 130-047-301          |
| Anti-human CD40 antibodies                       | Thermofisher                             | 14-0409-82           |

**Supplementary Figure S1.** A sketch map for plasmid construction of circ1857 overexpression.

Fig.S1

pLCDH-ciR-circ1857 plasmid construction

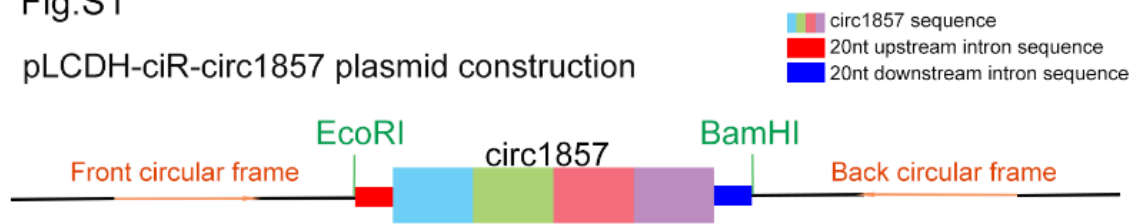



**Supplementary Figure S2.** The DNA-binding consensus sequence of the PAX5 according to the JASPAR database.

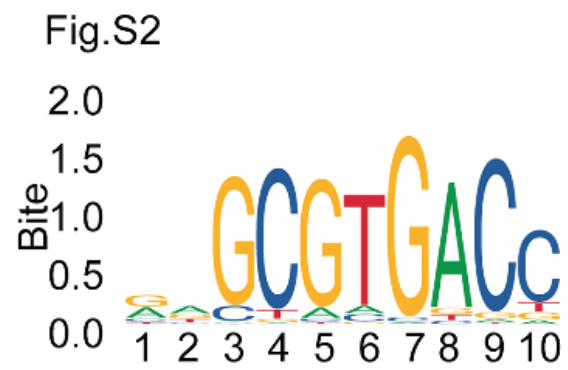

**Supplementary Figure S3.** PAX5 P80R mutation led to loss of function of binding with GINS1 promoter. (A) Recombinant PAX5 and P80R mutation protein production. Left: schematic representation of PAX5 domain structure. P80R mutation was in DNA binding region. Right: The recombinant PAX5 WT and PAX5 P80R were expressed and purified, then analyzed by SDS-PAGE. (B) EMSA. The left panel showed that SU-DHL-2 nuclear extract and recombinant PAX5 protein (Re-PAX5) can bind with probes and form the complex band. The other two panel showed that increased amount of recombinant PAX5 protein (Re-PAX5) can bind with probes and form the complex band, while recombinant PAX5 P80R protein (Re-PAX5 P80R) could not bind with probes and no complex band was observed. (C) Luciferase reporter assay(\*\**i>P*<0.001). (D) The influence of ectopic expression of Flag-PAX5 WT or Flag-PAX5 P80R on GINS1.

Fig.S3

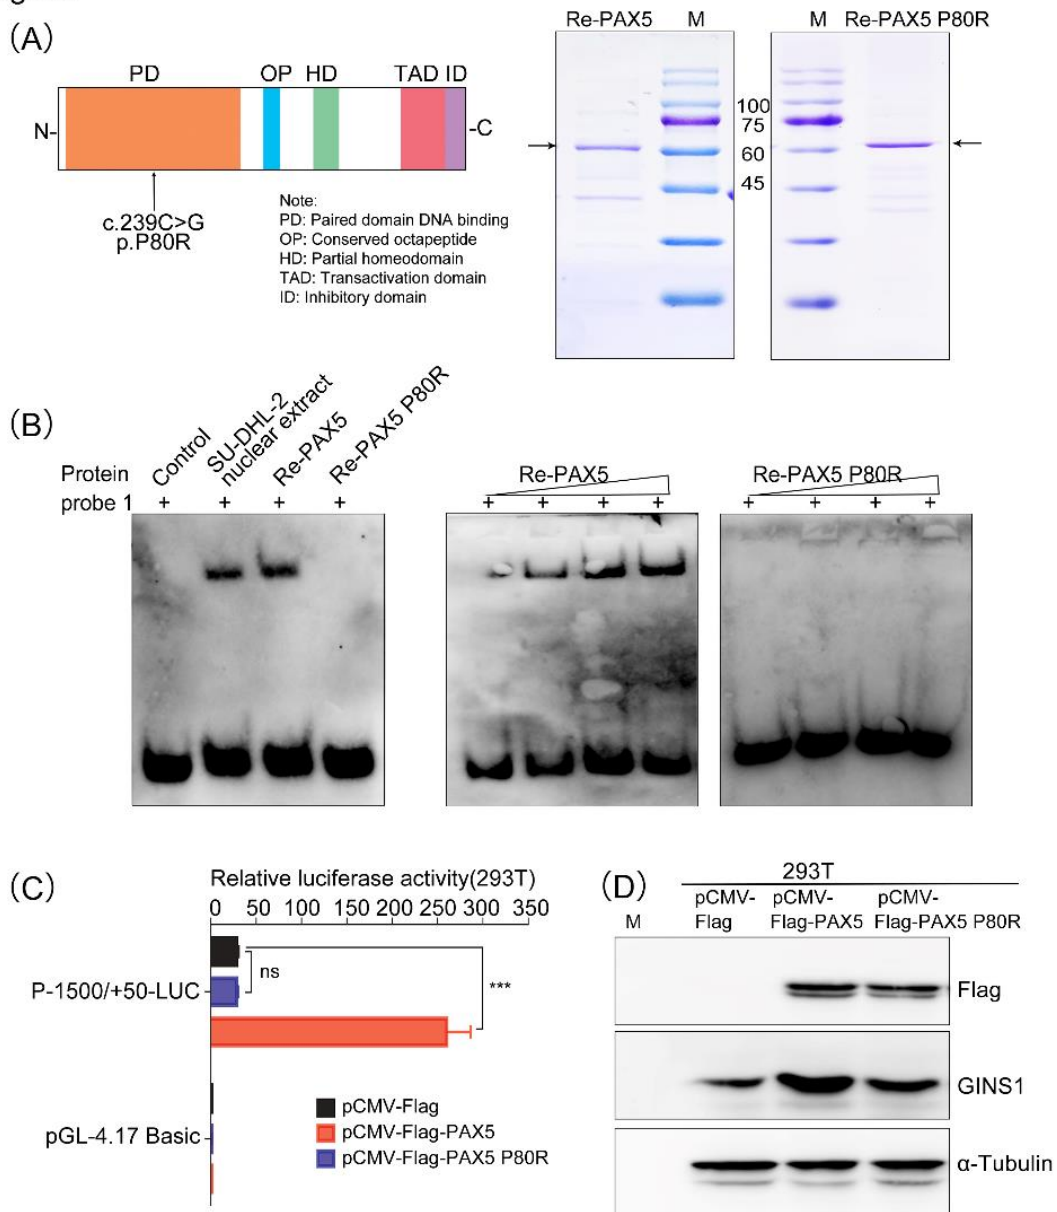

**Supplementary Figure S4.** The correlation between GINS1 and PAX5 expression level in DLBCL tissues in GEPIA database and the DLBCL cell lines. (A) The correlation between GINS1 and PAX5 expression level in DLBCL by GEPIA database. (B-C) Overexpressing PAX5 in IM-9 cell enhanced GINS1 level and facilitated cell proliferation, while knockdown PAX5 in DB cell decreased GINS1 level and inhibited cell proliferation. (B) Overexpression of PAX5 in IM-9. (B1) western blot. (B2) CCK8 assay. (C) Knockdown of PAX5 in DB cells. (C1) western blot. (C2) CCK8 assay. (D) GINS1 overexpression reversed GINS1 expression level decreased by PAX5 knock down in DB stable cell lines. (D1) western blot. (D2) CCK8 assay.

Fig.S4

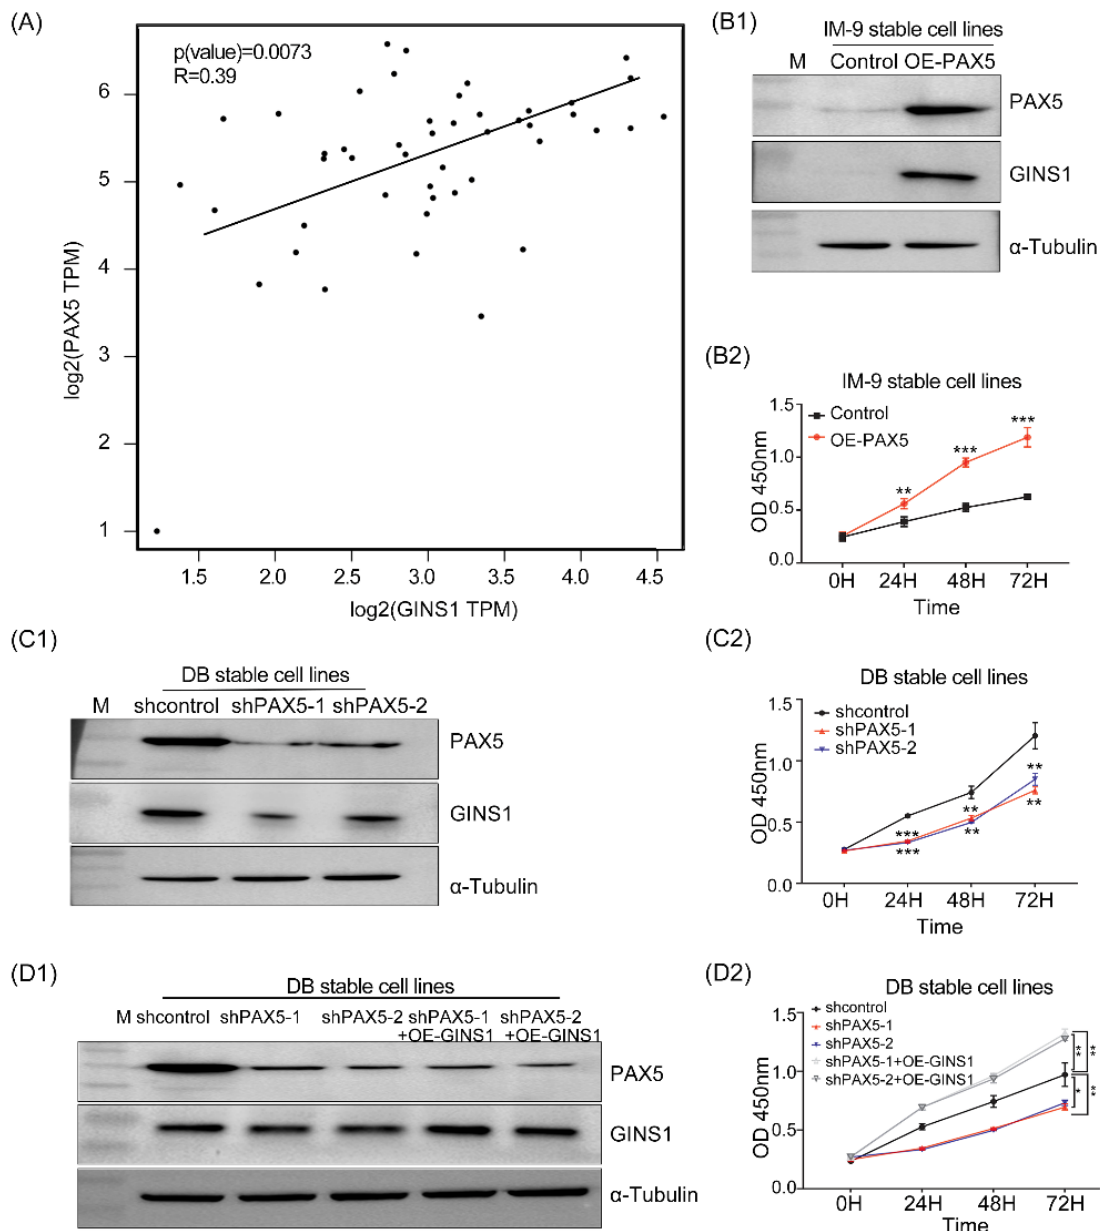

**Supplementary Figure S5.** Identification of circ1857 in SU-DHL-2 and DB cells. A-B. Circ1857 in SU-DHL-2 and DB cells was validated by RT-PCR with divergent primers and confirmed by sanger sequencing. PCR analysis for circ1857 and  $\beta$ -actin in cDNA in SU-DHL-2 (A1) and DB (B1) cells. RH: random hexamers, OdT: oligo(dT) 18 primers. (C) Predicted secondary stem-loop structure of circ1857. circ1857 was predicted to bind with 3-UTR of GINS1 mRNA.

Fig.S5

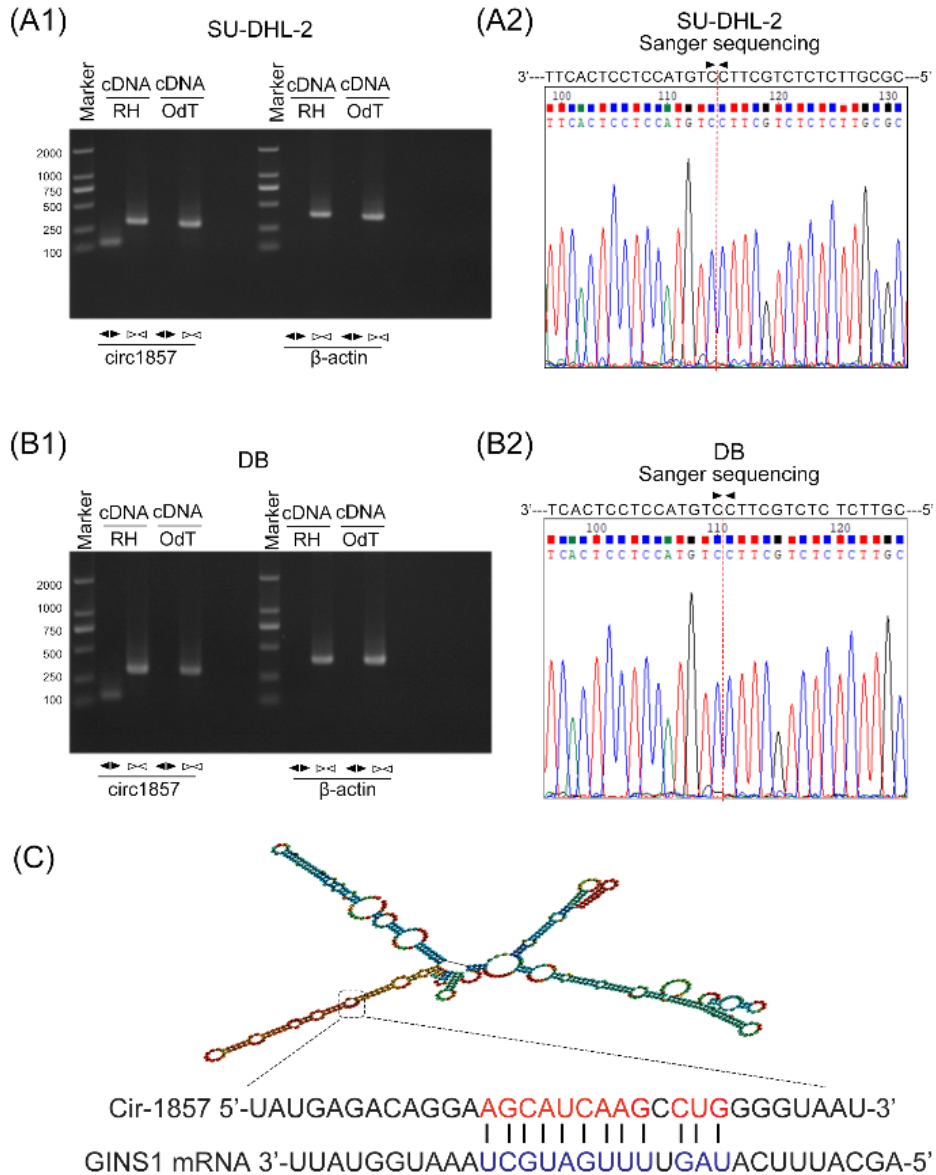

**Supplementary Figure S6.** Correlation between GINS1 and circ1857 in B cells. (A)The RNA level of GINS1 and circ1857 stimulated by LPS in IM-9 cells. (B)The RNA level of GINS1 and circ1857 stimulated by IL-21+anti-CD40 in SU-DHL-2 cells.

Fig.S6

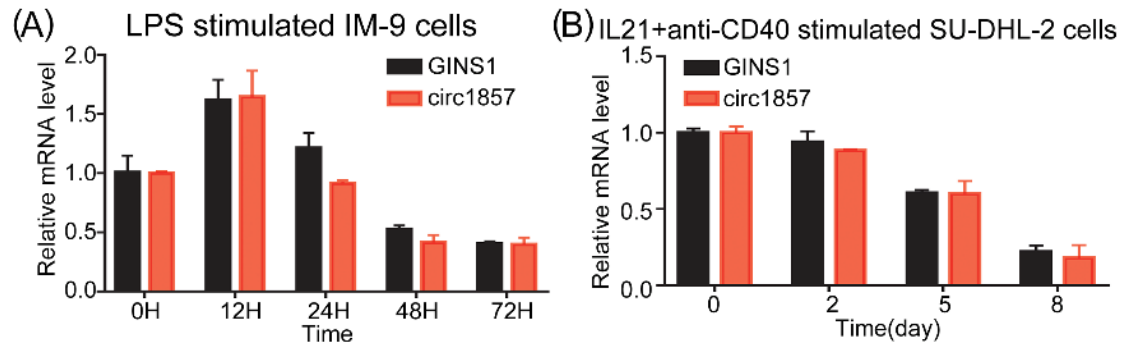

Supplement: CAS-114-3203-s001.pdf [file CAS-114-3203-s001.pdf]
